# Supplementary material for: Can P–H σ-bond complexes be prepared? A computational study by DFT and AIM methods
Source: Royal Society of Chemistry journal article supplement (doi:10.1039/b922191n), 2010-01-01
Supplement: b922191n.pdf [file b922191n.pdf]

## Supporting information

belonging to the manuscript

# Can P–H $\sigma$ -Bond complexes be prepared? A computational study using DFT and AIM methods

Richard P. L. Burchell, Peter Sirsch, Natascha N. L. Clark and G. Sean McGrady\*

Department of Chemistry, University of New Brunswick, PO Box 4400, Fredericton, NB, Canada E3B 5A3; email: smcgrady@unb.ca

### Contents:

- S 2 – Computational details
- S 3 – Table 1. Bond lengths (Å) for the P–H bond in the free phosphines **1a-21a** and the P–H, Mn–H and Mn–P bonds in the coordinated Mn–P–H moiety for complexes **1-21**.
- S 4 – Table 2. AIM charges of the Mn, P and H atoms and delocalisation indices ( $\delta$ ) between atom pairs Mn–P, Mn–H and P–H for complexes **1-7**.
- S 5 – Table 3. AIM charges of the Mn, P and H atoms and delocalisation indices ( $\delta$ ) between atom pairs Mn–P, Mn–H and P–H for complexes **8-14**.
- S 6 – Table 4. AIM charges of the Mn, P and H atoms and delocalisation indices ( $\delta$ ) between atom pairs Mn–P, Mn–H and P–H for complexes **15-21**.
- S 7 – S20 Cartesian coordinates of the calculated complexes **1-21**.

|          |   |                                                                                         |
|----------|---|-----------------------------------------------------------------------------------------|
| S7       | – | [CpMn(CO) <sub>2</sub> ( $\eta^2$ -HPFCl·BCl <sub>3</sub> )] <b>1</b>                   |
| S7-S8    | – | [CpMn(CO) <sub>2</sub> ( $\eta^2$ -HPClCl·BCl <sub>3</sub> )] <b>2</b>                  |
| S 8      | – | [CpMn(CO) <sub>2</sub> ( $\eta^2$ -HPBrCl·BCl <sub>3</sub> )] <b>3</b>                  |
| S8-S 9   | – | [CpMn(CO) <sub>2</sub> ( $\eta^2$ -HPPhCl·BCl <sub>3</sub> )] <b>4</b>                  |
| S9       | – | [CpMn(CO) <sub>2</sub> ( $\eta^2$ -HPMeCl·BCl <sub>3</sub> )] <b>5</b>                  |
| S9-S 10  | – | [CpMn(CO) <sub>2</sub> ( $\eta^2$ -HP(OMe)Cl·BCl <sub>3</sub> )] <b>6</b>               |
| S10-S 11 | – | [CpMn(CO) <sub>2</sub> ( $\eta^2$ -HP(NH <sub>2</sub> )Cl·BCl <sub>3</sub> )] <b>7</b>  |
| S11      | – | [CpMn(CO) <sub>2</sub> ( $\eta^2$ -HPFPh·BCl <sub>3</sub> )] <b>8</b>                   |
| S11-S12  | – | [CpMn(CO) <sub>2</sub> ( $\eta^2$ -HPClPh·BCl <sub>3</sub> )] <b>9</b>                  |
| S12-S13  | – | [CpMn(CO) <sub>2</sub> ( $\eta^2$ -HPBrPh·BCl <sub>3</sub> )] <b>10</b>                 |
| S13-S14  | – | [CpMn(CO) <sub>2</sub> ( $\eta^2$ -HPPhPh·BCl <sub>3</sub> )] <b>11</b>                 |
| S14      | – | [CpMn(CO) <sub>2</sub> ( $\eta^2$ -HPMePh·BCl <sub>3</sub> )] <b>12</b>                 |
| S15      | – | [CpMn(CO) <sub>2</sub> ( $\eta^2$ -HP(OMe)Ph·BCl <sub>3</sub> )] <b>13</b>              |
| S15-S16  | – | [CpMn(CO) <sub>2</sub> ( $\eta^2$ -HP(NH <sub>2</sub> )Ph·BCl <sub>3</sub> )] <b>14</b> |
| S16-S17  | – | [CpMn(CO) <sub>2</sub> ( $\eta^2$ -HPFH·BCl <sub>3</sub> )] <b>15</b>                   |

|         |   |                                                                                             |
|---------|---|---------------------------------------------------------------------------------------------|
| S17     | – | [CpMn(CO) <sub>2</sub> (η <sup>2</sup> -HPClH·BCl <sub>3</sub> )] <b>16</b>                 |
| S17-S18 | – | [CpMn(CO) <sub>2</sub> (η <sup>2</sup> -HPBrH·BCl <sub>3</sub> )] <b>17</b>                 |
| S18     | – | [CpMn(CO) <sub>2</sub> (η <sup>2</sup> -HPPhH·BCl <sub>3</sub> )] <b>18</b>                 |
| S18-S19 | – | [CpMn(CO) <sub>2</sub> (η <sup>2</sup> -HPMeH·BCl <sub>3</sub> )] <b>19</b>                 |
| S19     | – | [CpMn(CO) <sub>2</sub> (η <sup>2</sup> -HP(OMe)H·BCl <sub>3</sub> )] <b>20</b>              |
| S20     | – | [CpMn(CO) <sub>2</sub> (η <sup>2</sup> -HP(NH <sub>2</sub> )H·BCl <sub>3</sub> )] <b>21</b> |

- S21 – S28 Cartesian Coordinates for complexes 1a-21a as determined by DFT calculations at the [B3LYP/6-311G(d,p)] level of approximation.

|         |   |                                                    |
|---------|---|----------------------------------------------------|
| S21     | – | HPFCl·BCl <sub>3</sub> <b>1a</b>                   |
| S21     | – | HPClCl·BCl <sub>3</sub> <b>2a</b>                  |
| S21     | – | HPBrCl·BCl <sub>3</sub> <b>3a</b>                  |
| S21-S22 | – | HPPhCl·BCl <sub>3</sub> <b>4a</b>                  |
| S22     | – | HPMeCl·BCl <sub>3</sub> <b>5a</b>                  |
| S22     | – | HPF(OMe)Cl·BCl <sub>3</sub> <b>6a</b>              |
| S22     | – | HP(NH <sub>2</sub> )Cl·BCl <sub>3</sub> <b>7a</b>  |
| S23     | – | HPFPh·BCl <sub>3</sub> <b>8a</b>                   |
| S23     | – | HPClPh·BCl <sub>3</sub> <b>9a</b>                  |
| S23-S24 | – | HPBrPh·BCl <sub>3</sub> <b>10a</b>                 |
| S24     | – | HPPhPh·BCl <sub>3</sub> <b>11a</b>                 |
| S24-S25 | – | HPMePh·BCl <sub>3</sub> <b>12a</b>                 |
| S25     | – | HP(OMe)Ph·BCl <sub>3</sub> <b>13a</b>              |
| S25-S26 | – | HP(NH <sub>2</sub> )Ph·BCl <sub>3</sub> <b>14a</b> |
| S26     | – | HPFH·BCl <sub>3</sub> <b>15a</b>                   |
| S26     | – | HPClH·BCl <sub>3</sub> <b>16a</b>                  |
| S26     | – | HPBrH·BCl <sub>3</sub> <b>17a</b>                  |
| S27     | – | HPPhH·BCl <sub>3</sub> <b>18a</b>                  |
| S27     | – | HPMeH·BCl <sub>3</sub> <b>19a</b>                  |
| S27     | – | HP(OMe)H·BCl <sub>3</sub> <b>20a</b>               |
| S28     | – | HP(NH <sub>2</sub> )H·BCl <sub>3</sub> <b>21a</b>  |

- S28 – References

### Computational Details

DFT calculations were performed with the GAUSSIAN 03 program suite<sup>1</sup> using the B3LYP density functional,<sup>2</sup> along with the implemented 6-311G(d,p) basis set.<sup>3</sup> The geometry optimisations of complexes **1-21** and ligands **1a-21a** were performed with no imposed symmetry constraints. The reported structures were found to be true minima on the respective potential energy surface by calculating analytical frequencies.

| Complex                                                                                      | Interatomic Distances (Å) |                 |                  |                  |
|----------------------------------------------------------------------------------------------|---------------------------|-----------------|------------------|------------------|
|                                                                                              | $r_{\text{PH (free)}}$    | $r_{\text{PH}}$ | $r_{\text{MnH}}$ | $r_{\text{MnP}}$ |
| [CpMn(CO) <sub>2</sub> (η <sup>2</sup> -HPFCl·BCl <sub>3</sub> )] <b>1</b>                   | 1.407 ( <b>1a</b> )       | 1.996           | 1.535            | 2.262            |
| [CpMn(CO) <sub>2</sub> (η <sup>2</sup> -HPClCl·BCl <sub>3</sub> )] <b>2</b>                  | 1.408 ( <b>2a</b> )       | 2.031           | 1.533            | 2.291            |
| [CpMn(CO) <sub>2</sub> (η <sup>2</sup> -HPBrCl·BCl <sub>3</sub> )] <b>3</b>                  | 1.409 ( <b>3a</b> )       | 2.027           | 1.533            | 2.297            |
| [CpMn(CO) <sub>2</sub> (η <sup>2</sup> -HPPhCl·BCl <sub>3</sub> )] <b>4</b>                  | 1.406 ( <b>4a</b> )       | 2.121           | 1.531            | 2.341            |
| [CpMn(CO) <sub>2</sub> (η <sup>2</sup> -HPMeCl·BCl <sub>3</sub> )] <b>5</b>                  | 1.407 ( <b>5a</b> )       | 2.089           | 1.527            | 2.331            |
| [CpMn(CO) <sub>2</sub> (η <sup>2</sup> -HP(OMe)Cl·BCl <sub>3</sub> )] <b>6</b>               | 1.403 ( <b>6a</b> )       | 2.071           | 1.529            | 2.286            |
| [CpMn(CO) <sub>2</sub> (η <sup>2</sup> -HP(NH <sub>2</sub> )Cl·BCl <sub>3</sub> )] <b>7</b>  | 1.404 ( <b>7a</b> )       | 2.083           | 1.529            | 2.310            |
| [CpMn(CO) <sub>2</sub> (η <sup>2</sup> -HPFPh·BCl <sub>3</sub> )] <b>8</b>                   | 1.405 ( <b>8a</b> )       | 1.948           | 1.538            | 2.282            |
| [CpMn(CO) <sub>2</sub> (η <sup>2</sup> -HPClPh·BCl <sub>3</sub> )] <b>9</b>                  | 1.406 ( <b>9a</b> )       | 1.994           | 1.533            | 2.314            |
| [CpMn(CO) <sub>2</sub> (η <sup>2</sup> -HPBrPh·BCl <sub>3</sub> )] <b>10</b>                 | 1.407 ( <b>10a</b> )      | 1.983           | 1.533            | 2.323            |
| [CpMn(CO) <sub>2</sub> (η <sup>2</sup> -HPPh <sub>2</sub> ·BCl <sub>3</sub> )] <b>11</b>     | 1.408 ( <b>11a</b> )      | 2.090           | 1.529            | 2.376            |
| [CpMn(CO) <sub>2</sub> (η <sup>2</sup> -HPMePh·BCl <sub>3</sub> )] <b>12</b>                 | 1.407 ( <b>12a</b> )      | 2.080           | 1.526            | 2.366            |
| [CpMn(CO) <sub>2</sub> (η <sup>2</sup> -HP(OMe)Ph·BCl <sub>3</sub> )] <b>13</b>              | 1.414 ( <b>13a</b> )      | 1.997           | 1.533            | 2.329            |
| [CpMn(CO) <sub>2</sub> (η <sup>2</sup> -HP(NH <sub>2</sub> )Ph·BCl <sub>3</sub> )] <b>14</b> | 1.415 ( <b>14a</b> )      | 2.057           | 1.528            | 2.341            |
| [CpMn(CO) <sub>2</sub> (η <sup>2</sup> -HPFH·BCl <sub>3</sub> )] <b>15</b>                   | 1.405 ( <b>15a</b> )      | 1.953           | 1.540            | 2.265            |
| [CpMn(CO) <sub>2</sub> (η <sup>2</sup> -HPClH·BCl <sub>3</sub> )] <b>16</b>                  | 1.407 ( <b>16a</b> )      | 1.997           | 1.536            | 2.294            |
| [CpMn(CO) <sub>2</sub> (η <sup>2</sup> -HPBrH·BCl <sub>3</sub> )] <b>17</b>                  | 1.408 ( <b>17a</b> )      | 1.992           | 1.536            | 2.301            |
| [CpMn(CO) <sub>2</sub> (η <sup>2</sup> -HPPhH·BCl <sub>3</sub> )] <b>18</b>                  | 1.407 ( <b>18a</b> )      | 2.085           | 1.530            | 2.351            |
| [CpMn(CO) <sub>2</sub> (η <sup>2</sup> -HPMeH·BCl <sub>3</sub> )] <b>19</b>                  | 1.407 ( <b>19a</b> )      | 2.067           | 1.528            | 2.341            |
| [CpMn(CO) <sub>2</sub> (η <sup>2</sup> -HP(MeO)H·BCl <sub>3</sub> )] <b>20</b>               | 1.413 ( <b>20a</b> )      | 2.039           | 1.531            | 2.291            |
| [CpMn(CO) <sub>2</sub> (η <sup>2</sup> -HP(NH <sub>2</sub> )H·BCl <sub>3</sub> )] <b>21</b>  | 1.407 ( <b>21a</b> )      | 2.040           | 1.530            | 2.314            |

**Table 1.** Bond lengths (Å) for the P–H bond in the free phosphines **1a-21a** and the P–H, Mn–H and Mn–P bonds in the coordinated Mn–P–H moiety of complexes **1-21**.

| Complex  | Atom | Net Charge | Bond | $\delta$ |
|----------|------|------------|------|----------|
| <b>1</b> | Mn   | 0.879      | Mn–P | 0.73     |
|          | P    | 1.026      | Mn–H | 0.63     |
|          | H    | –0.123     | P–H  | 0.23     |
| <b>2</b> | Mn   | 0.887      | Mn–P | 0.71     |
|          | P    | 0.678      | Mn–H | 0.63     |
|          | H    | –0.113     | P–H  | 0.22     |
| <b>3</b> | Mn   | 0.892      | Mn–P | 0.71     |
|          | P    | 0.551      | Mn–H | 0.63     |
|          | H    | –0.112     | P–H  | 0.22     |
| <b>4</b> | Mn   | 0.880      | Mn–P | 0.68     |
|          | P    | 0.824      | Mn–H | 0.62     |
|          | H    | –0.089     | P–H  | 0.18     |
| <b>5</b> | Mn   | 0.880      | Mn–P | 0.68     |
|          | P    | 0.826      | Mn–H | 0.64     |
|          | H    | –0.096     | P–H  | 0.19     |
| <b>6</b> | Mn   | 0.886      | Mn–P | 0.70     |
|          | P    | 1.059      | Mn–H | 0.64     |
|          | H    | –0.108     | P–H  | 0.20     |
| <b>7</b> | Mn   | 0.881      | Mn–P | 0.68     |
|          | P    | 1.032      | Mn–H | 0.64     |
|          | H    | –0.105     | P–H  | 0.19     |

**Table 2.** AIM charges of the Mn, P and H atoms and delocalisation indices ( $\delta$ ) between atom pairs Mn–P, Mn–H and P–H for complexes **1-7**.

| Complex   | Atom | Net Charge | Bond | $\delta$ |
|-----------|------|------------|------|----------|
| <b>8</b>  | Mn   | 0.889      | Mn-P | 0.71     |
|           | P    | 1.180      | Mn-H | 0.62     |
|           | H    | -0.155     | P-H  | 0.26     |
| <b>9</b>  | Mn   | 0.896      | Mn-P | 0.69     |
|           | P    | 0.823      | Mn-H | 0.63     |
|           | H    | -0.146     | P-H  | 0.24     |
| <b>10</b> | Mn   | 0.899      | Mn-P | 0.69     |
|           | P    | 0.690      | Mn-H | 0.63     |
|           | H    | -0.145     | P-H  | 0.25     |
| <b>11</b> | Mn   | 0.89       | Mn-P | 0.65     |
|           | P    | 0.98       | Mn-H | 0.64     |
|           | H    | -0.12      | P-H  | 0.21     |
| <b>12</b> | Mn   | 0.874      | Mn-P | 0.66     |
|           | P    | 0.990      | Mn-H | 0.65     |
|           | H    | -0.123     | P-H  | 0.21     |
| <b>13</b> | Mn   | 0.885      | Mn-P | 0.67     |
|           | P    | 1.231      | Mn-H | 0.63     |
|           | H    | -0.145     | P-H  | 0.24     |
| <b>14</b> | Mn   | 0.881      | Mn-P | 0.67     |
|           | P    | 1.192      | Mn-H | 0.65     |
|           | H    | -0.132     | P-H  | 0.21     |

**Table 3.** AIM charges of the Mn, P and H atoms and delocalisation indices ( $\delta$ ) between atom pairs Mn-P, Mn-H and P-H for complexes **8-14**.

| Complex   | Atom | Net Charge | Bond | $\delta$ |
|-----------|------|------------|------|----------|
| <b>15</b> | Mn   | 0.877      | Mn–P | 0.71     |
|           | P    | 1.230      | Mn–H | 0.62     |
|           | H    | -0.136     | P–H  | 0.26     |
| <b>16</b> | Mn   | 0.885      | Mn–P | 0.70     |
|           | P    | 0.890      | Mn–H | 0.62     |
|           | H    | -0.120     | P–H  | 0.23     |
| <b>17</b> | Mn   | 0.887      | Mn–P | 0.69     |
|           | P    | 0.763      | Mn–H | 0.62     |
|           | H    | -0.119     | P–H  | 0.24     |
| <b>18</b> | Mn   | 0.879      | Mn–P | 0.66     |
|           | P    | 1.048      | Mn–H | 0.63     |
|           | H    | -0.101     | P–H  | 0.19     |
| <b>19</b> | Mn   | 0.885      | Mn–P | 0.66     |
|           | P    | 1.025      | Mn–H | 0.64     |
|           | H    | -0.103     | P–H  | 0.20     |
| <b>20</b> | Mn   | 0.876      | Mn–P | 0.69     |
|           | P    | 1.268      | Mn–H | 0.64     |
|           | H    | -0.118     | P–H  | 0.22     |
| <b>21</b> | Mn   | 0.871      | Mn–P | 0.67     |
|           | P    | 1.246      | Mn–H | 0.64     |
|           | H    | -0.116     | P–H  | 0.21     |

**Table 4.** AIM charges of the Mn, P and H atoms and delocalisation indices ( $\delta$ ) between atom pairs Mn–P, Mn–H and P–H for complexes **15-21**.

**Cartesian Coordinates for complexes 1-21 as determined by DFT calculations at the [B3LYP/6-311G(d,p)] level of approximation.**

**[CpMn(CO)<sub>2</sub>(η<sup>2</sup>-HPFCl·BCl<sub>3</sub>)] 1**

|    |              |              |              |
|----|--------------|--------------|--------------|
| 6  | 2.520534000  | -1.390735000 | -1.315923000 |
| 6  | 1.231844000  | -1.917513000 | -1.042403000 |
| 6  | 1.158496000  | -2.191068000 | 0.350970000  |
| 6  | 2.405046000  | -1.837468000 | 0.934293000  |
| 6  | 3.251513000  | -1.335746000 | -0.096261000 |
| 1  | 2.883151000  | -1.086976000 | -2.286734000 |
| 1  | 0.447402000  | -2.091726000 | -1.761465000 |
| 1  | 0.299237000  | -2.589200000 | 0.867539000  |
| 1  | 2.663733000  | -1.935060000 | 1.977761000  |
| 1  | 4.268787000  | -0.995429000 | 0.021399000  |
| 25 | 1.527731000  | -0.072690000 | 0.095663000  |
| 6  | 2.012127000  | 1.305697000  | -0.999415000 |
| 8  | 2.366390000  | 2.137099000  | -1.692654000 |
| 6  | 2.127357000  | 0.916608000  | 1.485355000  |
| 8  | 2.504812000  | 1.493311000  | 2.393883000  |
| 15 | -0.577859000 | 0.577198000  | -0.413759000 |
| 9  | -0.713982000 | 0.743340000  | -2.022898000 |
| 1  | 0.466712000  | 0.038220000  | 1.199593000  |
| 17 | -0.854871000 | 2.544675000  | 0.175378000  |
| 5  | -2.255552000 | -0.429361000 | 0.164970000  |
| 17 | -2.193400000 | -2.072333000 | -0.707041000 |
| 17 | -2.060478000 | -0.612246000 | 2.004401000  |
| 17 | -3.718422000 | 0.547802000  | -0.315772000 |

**[CpMn(CO)<sub>2</sub>(η<sup>2</sup>-HPClCl·BCl<sub>3</sub>)] 2**

|    |              |              |              |
|----|--------------|--------------|--------------|
| 6  | 2.497403000  | -1.025749000 | -1.600026000 |
| 6  | 1.274892000  | -1.698677000 | -1.352896000 |
| 6  | 1.339879000  | -2.266422000 | -0.051487000 |
| 6  | 2.613290000  | -1.955749000 | 0.498549000  |
| 6  | 3.332650000  | -1.180389000 | -0.453852000 |
| 1  | 2.751952000  | -0.495582000 | -2.505544000 |
| 1  | 0.437960000  | -1.769710000 | -2.028943000 |
| 1  | 0.554339000  | -2.830706000 | 0.426451000  |
| 1  | 2.969758000  | -2.254469000 | 1.472857000  |
| 1  | 4.336377000  | -0.800835000 | -0.340164000 |
| 25 | 1.573305000  | -0.116257000 | 0.132905000  |
| 6  | 2.058843000  | 1.514371000  | -0.544408000 |
| 8  | 2.415114000  | 2.507619000  | -0.971775000 |
| 6  | 2.103253000  | 0.485723000  | 1.751269000  |
| 8  | 2.441128000  | 0.808049000  | 2.791892000  |
| 15 | -0.576690000 | 0.591278000  | -0.218660000 |
| 17 | -0.854036000 | 1.197130000  | -2.209976000 |
| 1  | 0.516074000  | -0.335886000 | 1.220780000  |
| 17 | -0.861697000 | 2.379575000  | 0.812336000  |

|    |              |              |              |
|----|--------------|--------------|--------------|
| 5  | -2.217170000 | -0.570631000 | 0.258494000  |
| 17 | -2.133692000 | -2.053612000 | -0.854529000 |
| 17 | -1.916125000 | -1.019341000 | 2.034872000  |
| 17 | -3.724691000 | 0.414695000  | 0.004093000  |

[CpMn(CO)<sub>2</sub>(η<sup>2</sup>-HPBrCl·BCl<sub>3</sub>)] **3**

|    |              |              |              |
|----|--------------|--------------|--------------|
| 6  | 2.486773000  | 0.425732000  | -1.853801000 |
| 6  | 1.343553000  | -0.370434000 | -2.112383000 |
| 6  | 1.578597000  | -1.666379000 | -1.578237000 |
| 6  | 2.878310000  | -1.673512000 | -1.003052000 |
| 6  | 3.443467000  | -0.377469000 | -1.163430000 |
| 1  | 2.610944000  | 1.459639000  | -2.138739000 |
| 1  | 0.447815000  | -0.052843000 | -2.621185000 |
| 1  | 0.885221000  | -2.492374000 | -1.607995000 |
| 1  | 3.351126000  | -2.516940000 | -0.522728000 |
| 1  | 4.426371000  | -0.066724000 | -0.844359000 |
| 25 | 1.686744000  | -0.227645000 | 0.045307000  |
| 6  | 2.027486000  | 1.446470000  | 0.704833000  |
| 8  | 2.296477000  | 2.481487000  | 1.095681000  |
| 6  | 2.308472000  | -0.884575000 | 1.608775000  |
| 8  | 2.709683000  | -1.352798000 | 2.568429000  |
| 15 | -0.527446000 | 0.310561000  | 0.337002000  |
| 35 | -1.070469000 | 2.233041000  | -0.750124000 |
| 1  | 0.729545000  | -1.241227000 | 0.683080000  |
| 17 | -0.814193000 | 0.836001000  | 2.336283000  |
| 5  | -2.046034000 | -1.039704000 | -0.073868000 |
| 17 | -1.979096000 | -1.348663000 | -1.901729000 |
| 17 | -1.545305000 | -2.540565000 | 0.899117000  |
| 17 | -3.629677000 | -0.325788000 | 0.463906000  |

[CpMn(CO)<sub>2</sub>(η<sup>2</sup>-HPPhCl·BCl<sub>3</sub>)] **4**

|    |              |              |              |
|----|--------------|--------------|--------------|
| 6  | -1.694757000 | -1.867634000 | -1.724309000 |
| 6  | -1.115842000 | -0.654020000 | -2.171823000 |
| 6  | -2.095853000 | 0.369912000  | -2.071817000 |
| 6  | -3.291316000 | -0.219049000 | -1.578042000 |
| 6  | -3.048017000 | -1.600996000 | -1.351730000 |
| 1  | -1.199797000 | -2.826095000 | -1.684050000 |
| 1  | -0.108287000 | -0.522881000 | -2.530279000 |
| 1  | -1.947749000 | 1.407012000  | -2.328003000 |
| 1  | -4.222159000 | 0.297628000  | -1.398074000 |
| 1  | -3.763536000 | -2.322207000 | -0.987815000 |
| 25 | -1.753708000 | -0.458774000 | -0.090444000 |
| 6  | -1.481848000 | -1.820256000 | 1.084940000  |
| 8  | -1.384960000 | -2.707595000 | 1.797637000  |
| 6  | -2.874376000 | 0.261271000  | 1.117499000  |
| 8  | -3.611964000 | 0.750506000  | 1.840266000  |
| 15 | 0.424211000  | 0.208776000  | 0.449588000  |
| 1  | -1.527796000 | 1.015878000  | 0.254252000  |



|    |              |              |              |
|----|--------------|--------------|--------------|
| 17 | 0.524238000  | 0.361677000  | 2.538397000  |
| 5  | 1.048081000  | 2.063380000  | -0.170776000 |
| 17 | 0.996692000  | 2.089810000  | -2.049098000 |
| 17 | -0.198662000 | 3.252924000  | 0.516059000  |
| 17 | 2.742470000  | 2.353626000  | 0.462348000  |
| 6  | 1.688088000  | -1.087328000 | 0.102368000  |
| 6  | 2.469661000  | -0.992518000 | -1.057300000 |
| 1  | 2.380799000  | -0.136894000 | -1.713049000 |
| 6  | 1.860705000  | -2.185778000 | 0.955382000  |
| 1  | 1.290592000  | -2.264469000 | 1.871142000  |
| 6  | 2.792403000  | -3.172154000 | 0.648636000  |
| 6  | 3.397480000  | -1.987103000 | -1.358693000 |
| 6  | 3.559731000  | -3.078587000 | -0.510706000 |
| 1  | 4.003901000  | -1.894645000 | -2.252283000 |
| 1  | 2.923629000  | -4.010362000 | 1.323271000  |
| 1  | 4.288034000  | -3.846636000 | -0.744613000 |

[CpMn(CO)<sub>2</sub>(η<sup>2</sup>-HPMeCl·BCl<sub>3</sub>)] **5**

|    |              |              |              |
|----|--------------|--------------|--------------|
| 6  | 2.528031000  | -1.316711000 | -1.386387000 |
| 6  | 1.281696000  | -1.912498000 | -1.068078000 |
| 6  | 1.275481000  | -2.205288000 | 0.322251000  |
| 6  | 2.528983000  | -1.802205000 | 0.858815000  |
| 6  | 3.305767000  | -1.242218000 | -0.193920000 |
| 1  | 2.838920000  | -0.986742000 | -2.366479000 |
| 1  | 0.476024000  | -2.123327000 | -1.752002000 |
| 1  | 0.457625000  | -2.651439000 | 0.866165000  |
| 1  | 2.834356000  | -1.900244000 | 1.889624000  |
| 1  | 4.309367000  | -0.854784000 | -0.110708000 |
| 25 | 1.538601000  | -0.067203000 | 0.084950000  |
| 6  | 2.028300000  | 1.380727000  | -0.901788000 |
| 8  | 2.380252000  | 2.265317000  | -1.532841000 |
| 6  | 2.018219000  | 0.850736000  | 1.559756000  |
| 8  | 2.328496000  | 1.379525000  | 2.522945000  |
| 15 | -0.619976000 | 0.610370000  | -0.478304000 |
| 6  | -0.892073000 | 0.929978000  | -2.270624000 |
| 1  | 0.467896000  | -0.060371000 | 1.173883000  |
| 17 | -0.883655000 | 2.539054000  | 0.299468000  |
| 5  | -2.210353000 | -0.462961000 | 0.188804000  |
| 17 | -2.154536000 | -2.069181000 | -0.782547000 |
| 17 | -1.963712000 | -0.756276000 | 2.002478000  |
| 17 | -3.747565000 | 0.475114000  | -0.176193000 |
| 1  | -0.819265000 | -0.016047000 | -2.809994000 |
| 1  | -0.157507000 | 1.635576000  | -2.657841000 |
| 1  | -1.896488000 | 1.334754000  | -2.401339000 |

[CpMn(CO)<sub>2</sub>(η<sup>2</sup>-HP(OMe)Cl·BCl<sub>3</sub>)] **6**

|   |             |              |              |
|---|-------------|--------------|--------------|
| 6 | 2.536478000 | -0.874440000 | -1.716325000 |
| 6 | 1.318081000 | -1.565288000 | -1.497814000 |

|    |              |              |              |
|----|--------------|--------------|--------------|
| 6  | 1.400086000  | -2.210283000 | -0.234369000 |
| 6  | 2.677166000  | -1.924612000 | 0.321770000  |
| 6  | 3.383586000  | -1.091202000 | -0.591370000 |
| 1  | 2.777957000  | -0.286252000 | -2.588981000 |
| 1  | 0.472039000  | -1.592556000 | -2.164907000 |
| 1  | 0.622159000  | -2.803578000 | 0.220141000  |
| 1  | 3.044280000  | -2.278376000 | 1.273272000  |
| 1  | 4.385800000  | -0.711561000 | -0.465897000 |
| 25 | 1.620583000  | -0.077915000 | 0.080937000  |
| 6  | 1.977789000  | 1.587232000  | -0.578410000 |
| 8  | 2.256825000  | 2.606186000  | -1.005754000 |
| 6  | 2.219265000  | 0.497536000  | 1.680477000  |
| 8  | 2.603264000  | 0.804676000  | 2.710995000  |
| 15 | -0.553472000 | 0.585089000  | -0.168041000 |
| 8  | -0.685712000 | 1.138306000  | -1.691331000 |
| 1  | 0.646130000  | -0.374469000 | 1.221590000  |
| 17 | -0.880881000 | 2.294034000  | 1.020690000  |
| 5  | -2.101209000 | -0.661436000 | 0.296586000  |
| 17 | -2.120182000 | -1.944301000 | -1.065267000 |
| 17 | -1.676206000 | -1.413250000 | 1.939615000  |
| 17 | -3.679425000 | 0.277972000  | 0.354413000  |
| 6  | -1.911931000 | 1.622637000  | -2.295429000 |
| 1  | -1.616186000 | 2.038165000  | -3.256869000 |
| 1  | -2.613131000 | 0.800839000  | -2.434277000 |
| 1  | -2.359810000 | 2.397947000  | -1.672954000 |

[CpMn(CO)<sub>2</sub>(η<sup>2</sup>-HP(NH<sub>2</sub>)Cl·BCl<sub>3</sub>)] 7

|    |              |              |              |
|----|--------------|--------------|--------------|
| 6  | 2.506134000  | -1.382477000 | -1.341325000 |
| 6  | 1.265037000  | -1.959798000 | -0.973975000 |
| 6  | 1.285976000  | -2.190259000 | 0.427374000  |
| 6  | 2.550175000  | -1.765725000 | 0.922895000  |
| 6  | 3.307904000  | -1.257121000 | -0.168135000 |
| 1  | 2.797885000  | -1.097799000 | -2.341253000 |
| 1  | 0.439148000  | -2.172515000 | -1.633163000 |
| 1  | 0.477387000  | -2.610035000 | 1.004813000  |
| 1  | 2.874587000  | -1.817848000 | 1.951252000  |
| 1  | 4.314004000  | -0.869985000 | -0.121295000 |
| 25 | 1.548552000  | -0.065195000 | 0.086481000  |
| 6  | 2.015542000  | 1.327218000  | -0.981733000 |
| 8  | 2.341889000  | 2.172625000  | -1.678555000 |
| 6  | 2.050839000  | 0.927050000  | 1.506204000  |
| 8  | 2.376861000  | 1.503269000  | 2.435719000  |
| 15 | -0.597295000 | 0.560798000  | -0.498084000 |
| 7  | -0.798402000 | 0.615664000  | -2.160125000 |
| 1  | 0.487615000  | -0.010468000 | 1.186174000  |
| 17 | -0.868525000 | 2.542643000  | 0.227711000  |
| 5  | -2.226567000 | -0.444127000 | 0.187093000  |
| 17 | -2.134538000 | -2.181028000 | -0.490838000 |
| 17 | -2.113858000 | -0.430257000 | 2.032214000  |

|    |              |             |              |
|----|--------------|-------------|--------------|
| 17 | -3.715892000 | 0.436438000 | -0.460510000 |
| 1  | -0.148410000 | 1.150012000 | -2.720526000 |
| 1  | -1.756770000 | 0.704522000 | -2.482302000 |

[CpMn(CO)<sub>2</sub>(η<sup>2</sup>-HPFPh·BCl<sub>3</sub>)] **8**

|    |              |              |              |
|----|--------------|--------------|--------------|
| 6  | 3.343099000  | -1.846837000 | -0.165904000 |
| 6  | 2.420197000  | -2.062220000 | -1.232126000 |
| 6  | 1.194029000  | -2.504029000 | -0.676316000 |
| 6  | 1.349848000  | -2.564019000 | 0.735020000  |
| 6  | 2.675377000  | -2.165573000 | 1.049557000  |
| 1  | 4.367641000  | -1.523209000 | -0.264927000 |
| 1  | 2.618981000  | -1.915782000 | -2.283151000 |
| 1  | 0.299830000  | -2.752696000 | -1.225547000 |
| 1  | 0.589769000  | -2.862411000 | 1.439403000  |
| 1  | 3.101618000  | -2.111819000 | 2.039952000  |
| 25 | 1.683302000  | -0.515478000 | 0.088289000  |
| 6  | 2.223549000  | 0.689365000  | -1.182422000 |
| 8  | 2.666549000  | 1.353892000  | -1.993597000 |
| 6  | 2.374508000  | 0.610198000  | 1.330957000  |
| 8  | 2.826853000  | 1.263201000  | 2.147802000  |
| 15 | -0.410694000 | 0.208320000  | -0.460290000 |
| 1  | 0.605734000  | -0.219883000 | 1.145967000  |
| 5  | -1.031403000 | 2.034422000  | 0.132820000  |
| 17 | -1.118368000 | 1.917499000  | 1.998065000  |
| 17 | -2.677105000 | 2.341896000  | -0.630116000 |
| 17 | 0.243651000  | 3.267526000  | -0.403760000 |
| 6  | -1.718588000 | -1.027570000 | -0.126849000 |
| 6  | -2.487695000 | -1.523418000 | -1.186944000 |
| 1  | -2.292500000 | -1.189040000 | -2.197036000 |
| 6  | -2.003455000 | -1.440643000 | 1.181543000  |
| 1  | -1.443716000 | -1.041245000 | 2.018072000  |
| 6  | -3.034921000 | -2.343751000 | 1.420384000  |
| 6  | -3.513317000 | -2.432995000 | -0.939743000 |
| 6  | -3.788307000 | -2.845930000 | 0.360919000  |
| 1  | -4.104244000 | -2.808679000 | -1.767151000 |
| 1  | -3.255135000 | -2.647042000 | 2.437426000  |
| 1  | -4.591685000 | -3.548429000 | 0.550690000  |
| 9  | -0.492624000 | 0.228933000  | -2.099329000 |

[CpMn(CO)<sub>2</sub>(η<sup>2</sup>-HPClPh·BCl<sub>3</sub>)] **9**

|   |             |              |              |
|---|-------------|--------------|--------------|
| 6 | 3.444504000 | -1.701715000 | -0.226328000 |
| 6 | 2.529760000 | -1.842562000 | -1.313369000 |
| 6 | 1.327348000 | -2.395719000 | -0.808970000 |
| 6 | 1.486287000 | -2.596943000 | 0.588751000  |
| 6 | 2.794385000 | -2.177707000 | 0.945986000  |
| 1 | 4.454181000 | -1.325800000 | -0.286736000 |
| 1 | 2.716726000 | -1.575666000 | -2.342422000 |
| 1 | 0.441420000 | -2.615668000 | -1.383268000 |

|    |              |              |              |
|----|--------------|--------------|--------------|
| 1  | 0.740665000  | -2.999845000 | 1.255524000  |
| 1  | 3.220115000  | -2.209555000 | 1.937669000  |
| 25 | 1.731721000  | -0.476687000 | 0.158461000  |
| 6  | 2.311014000  | 0.898728000  | -0.911105000 |
| 8  | 2.791196000  | 1.670659000  | -1.595454000 |
| 6  | 2.312581000  | 0.500664000  | 1.568320000  |
| 8  | 2.693406000  | 1.056932000  | 2.487509000  |
| 15 | -0.407988000 | 0.195062000  | -0.411262000 |
| 1  | 0.629544000  | -0.319340000 | 1.212085000  |
| 5  | -1.118185000 | 1.979635000  | 0.296222000  |
| 17 | -1.089858000 | 1.783799000  | 2.154099000  |
| 17 | -2.819114000 | 2.208717000  | -0.354828000 |
| 17 | 0.051794000  | 3.298133000  | -0.256911000 |
| 6  | -1.667627000 | -1.111787000 | -0.075294000 |
| 6  | -2.504974000 | -1.628399000 | -1.070178000 |
| 1  | -2.408611000 | -1.294309000 | -2.093639000 |
| 6  | -1.842657000 | -1.542676000 | 1.249043000  |
| 1  | -1.232553000 | -1.136882000 | 2.045612000  |
| 6  | -2.825681000 | -2.475727000 | 1.563037000  |
| 6  | -3.481767000 | -2.568762000 | -0.749483000 |
| 6  | -3.645108000 | -2.996439000 | 0.564067000  |
| 1  | -4.122026000 | -2.957270000 | -1.533055000 |
| 1  | -2.954592000 | -2.787415000 | 2.593147000  |
| 1  | -4.410254000 | -3.723452000 | 0.810706000  |
| 17 | -0.493535000 | 0.359457000  | -2.517220000 |

[CpMn(CO)<sub>2</sub>(η<sup>2</sup>-HPBrPh·BCl<sub>3</sub>)] **10**

|    |              |              |              |
|----|--------------|--------------|--------------|
| 6  | 3.526774000  | 1.619260000  | 0.313489000  |
| 6  | 2.577662000  | 1.685861000  | 1.377347000  |
| 6  | 1.407934000  | 2.315249000  | 0.885576000  |
| 6  | 1.622358000  | 2.640619000  | -0.480999000 |
| 6  | 2.931077000  | 2.219097000  | -0.831386000 |
| 1  | 4.523856000  | 1.210895000  | 0.372383000  |
| 1  | 2.720357000  | 1.320090000  | 2.382788000  |
| 1  | 0.507792000  | 2.504946000  | 1.448241000  |
| 1  | 0.911322000  | 3.122903000  | -1.132587000 |
| 1  | 3.393223000  | 2.329681000  | -1.800874000 |
| 25 | 1.800150000  | 0.482745000  | -0.241261000 |
| 6  | 2.304905000  | -1.006105000 | 0.706529000  |
| 8  | 2.746146000  | -1.856989000 | 1.320149000  |
| 6  | 2.413584000  | -0.369192000 | -1.716542000 |
| 8  | 2.817774000  | -0.843709000 | -2.671142000 |
| 15 | -0.389009000 | -0.171310000 | 0.180211000  |
| 1  | 0.731236000  | 0.435240000  | -1.339822000 |
| 5  | -1.111898000 | -1.869209000 | -0.724061000 |
| 17 | -0.981252000 | -1.504246000 | -2.552217000 |
| 17 | -2.850321000 | -2.105587000 | -0.187311000 |
| 17 | -0.005967000 | -3.267349000 | -0.241788000 |
| 6  | -1.589105000 | 1.204105000  | -0.119115000 |

|    |              |              |              |
|----|--------------|--------------|--------------|
| 6  | -2.478299000 | 1.666025000  | 0.857047000  |
| 1  | -2.459119000 | 1.246565000  | 1.853088000  |
| 6  | -1.662340000 | 1.749793000  | -1.411084000 |
| 1  | -1.012554000 | 1.391370000  | -2.198669000 |
| 6  | -2.593752000 | 2.739611000  | -1.708165000 |
| 6  | -3.403534000 | 2.663028000  | 0.554840000  |
| 6  | -3.463996000 | 3.204515000  | -0.724897000 |
| 1  | -4.083559000 | 3.006997000  | 1.325637000  |
| 1  | -2.642291000 | 3.139577000  | -2.714473000 |
| 1  | -4.188090000 | 3.976552000  | -0.958329000 |
| 35 | -0.595545000 | -0.551751000 | 2.428164000  |

[CpMn(CO)<sub>2</sub>(η<sup>2</sup>-HPPPh<sub>2</sub>·BCl<sub>3</sub>)] **11**

|    |              |              |              |
|----|--------------|--------------|--------------|
| 6  | 3.556320000  | 0.202066000  | -1.623519000 |
| 6  | 2.319126000  | 0.506627000  | -2.273217000 |
| 6  | 1.581223000  | -0.697268000 | -2.387680000 |
| 6  | 2.346289000  | -1.743940000 | -1.807223000 |
| 6  | 3.569227000  | -1.188773000 | -1.347724000 |
| 1  | 4.347733000  | 0.900708000  | -1.399532000 |
| 1  | 2.005132000  | 1.478626000  | -2.621565000 |
| 1  | 0.605506000  | -0.812413000 | -2.830700000 |
| 1  | 2.059682000  | -2.781474000 | -1.746174000 |
| 1  | 4.366168000  | -1.730019000 | -0.860150000 |
| 25 | 1.935703000  | -0.233858000 | -0.283660000 |
| 6  | 2.012210000  | 1.461839000  | 0.388215000  |
| 8  | 2.167302000  | 2.537357000  | 0.734882000  |
| 6  | 2.697545000  | -0.797371000 | 1.252369000  |
| 8  | 3.220097000  | -1.209818000 | 2.179121000  |
| 15 | -0.398153000 | -0.002024000 | 0.098772000  |
| 1  | 1.158586000  | -1.366629000 | 0.388536000  |
| 5  | -0.936563000 | -0.190905000 | 2.060943000  |
| 17 | -0.576357000 | -1.961257000 | 2.516890000  |
| 17 | -2.738240000 | 0.199406000  | 2.224226000  |
| 17 | 0.114135000  | 0.963518000  | 3.089060000  |
| 6  | -1.429334000 | -1.241188000 | -0.802633000 |
| 6  | -2.714350000 | -0.895484000 | -1.244387000 |
| 1  | -3.078593000 | 0.114983000  | -1.118881000 |
| 6  | -1.011980000 | -2.571660000 | -0.935383000 |
| 1  | -0.046476000 | -2.878145000 | -0.556054000 |
| 6  | -1.842554000 | -3.524099000 | -1.518627000 |
| 6  | -3.542080000 | -1.849607000 | -1.830004000 |
| 6  | -3.107935000 | -3.164259000 | -1.974950000 |
| 1  | -4.533471000 | -1.562925000 | -2.161714000 |
| 1  | -1.503075000 | -4.550008000 | -1.605133000 |
| 1  | -3.755456000 | -3.906140000 | -2.428244000 |
| 6  | -0.954410000 | 1.620302000  | -0.597211000 |
| 6  | -1.070674000 | 1.797641000  | -1.984514000 |
| 6  | -1.203793000 | 2.711664000  | 0.243586000  |
| 1  | -0.907862000 | 0.964138000  | -2.656822000 |

|   |              |             |              |
|---|--------------|-------------|--------------|
| 1 | -1.124375000 | 2.605090000 | 1.316410000  |
| 6 | -1.430498000 | 3.031771000 | -2.516298000 |
| 6 | -1.562317000 | 3.947013000 | -0.293764000 |
| 1 | -1.525826000 | 3.146873000 | -3.590313000 |
| 1 | -1.757181000 | 4.778623000 | 0.373492000  |
| 6 | -1.675669000 | 4.112550000 | -1.670304000 |
| 1 | -1.957360000 | 5.074448000 | -2.083353000 |

[CpMn(CO)<sub>2</sub>(η<sup>2</sup>-HPMePh·BCl<sub>3</sub>)] **12**

|    |              |              |              |
|----|--------------|--------------|--------------|
| 6  | 3.384223000  | -1.784527000 | -0.153405000 |
| 6  | 2.471423000  | -2.017034000 | -1.226292000 |
| 6  | 1.251926000  | -2.481247000 | -0.675457000 |
| 6  | 1.397095000  | -2.534875000 | 0.736694000  |
| 6  | 2.715752000  | -2.115243000 | 1.056980000  |
| 1  | 4.403653000  | -1.443324000 | -0.245562000 |
| 1  | 2.679596000  | -1.874497000 | -2.275993000 |
| 1  | 0.362123000  | -2.746445000 | -1.223748000 |
| 1  | 0.637290000  | -2.845130000 | 1.436184000  |
| 1  | 3.135720000  | -2.052972000 | 2.049601000  |
| 25 | 1.703998000  | -0.480011000 | 0.092647000  |
| 6  | 2.300280000  | 0.771145000  | -1.090776000 |
| 8  | 2.778171000  | 1.480893000  | -1.846758000 |
| 6  | 2.288527000  | 0.608011000  | 1.408046000  |
| 8  | 2.678793000  | 1.237004000  | 2.276603000  |
| 15 | -0.451174000 | 0.222901000  | -0.583920000 |
| 1  | 0.632388000  | -0.197092000 | 1.141584000  |
| 5  | -1.097556000 | 1.993486000  | 0.154338000  |
| 17 | -1.060570000 | 1.924629000  | 2.017321000  |
| 17 | -2.815399000 | 2.268451000  | -0.487776000 |
| 17 | 0.088455000  | 3.288394000  | -0.478152000 |
| 6  | -1.701866000 | -1.074708000 | -0.191172000 |
| 6  | -2.398291000 | -1.754341000 | -1.198568000 |
| 1  | -2.214438000 | -1.534435000 | -2.242027000 |
| 6  | -1.996182000 | -1.375590000 | 1.146913000  |
| 1  | -1.495035000 | -0.844408000 | 1.945955000  |
| 6  | -2.955805000 | -2.331866000 | 1.463742000  |
| 6  | -3.354701000 | -2.716438000 | -0.877459000 |
| 6  | -3.635409000 | -3.009450000 | 0.453178000  |
| 1  | -3.885441000 | -3.228256000 | -1.672292000 |
| 1  | -3.179285000 | -2.539341000 | 2.504059000  |
| 1  | -4.383587000 | -3.753172000 | 0.702241000  |
| 6  | -0.540101000 | 0.394976000  | -2.420247000 |
| 1  | -0.211415000 | -0.513881000 | -2.926119000 |
| 1  | -1.561729000 | 0.640581000  | -2.713178000 |
| 1  | 0.106418000  | 1.220594000  | -2.715269000 |

[CpMn(CO)<sub>2</sub>(η<sup>2</sup>-HP(OMe)Ph·BCl<sub>3</sub>)] **13**

|    |              |              |              |
|----|--------------|--------------|--------------|
| 6  | 3.455019000  | -1.686473000 | -0.323931000 |
| 6  | 2.557434000  | -1.731798000 | -1.431550000 |
| 6  | 1.342143000  | -2.313760000 | -0.993548000 |
| 6  | 1.479229000  | -2.632211000 | 0.385027000  |
| 6  | 2.782903000  | -2.253024000 | 0.795479000  |
| 1  | 4.467178000  | -1.312810000 | -0.337908000 |
| 1  | 2.764089000  | -1.384253000 | -2.432345000 |
| 1  | 0.464924000  | -2.474492000 | -1.599380000 |
| 1  | 0.719922000  | -3.080090000 | 1.005799000  |
| 1  | 3.192678000  | -2.368175000 | 1.787697000  |
| 25 | 1.739668000  | -0.483025000 | 0.133131000  |
| 6  | 2.290126000  | 0.963119000  | -0.823308000 |
| 8  | 2.773400000  | 1.793499000  | -1.441873000 |
| 6  | 2.323018000  | 0.380897000  | 1.608651000  |
| 8  | 2.703758000  | 0.869694000  | 2.567114000  |
| 15 | -0.421146000 | 0.184457000  | -0.422736000 |
| 1  | 0.631572000  | -0.360253000 | 1.184837000  |
| 5  | -1.138308000 | 1.884555000  | 0.418515000  |
| 17 | -1.146511000 | 1.593536000  | 2.258565000  |
| 17 | -2.846740000 | 2.159239000  | -0.244438000 |
| 17 | 0.009883000  | 3.284920000  | -0.014903000 |
| 6  | -1.637699000 | -1.158679000 | -0.103297000 |
| 6  | -2.446762000 | -1.632194000 | -1.142718000 |
| 1  | -2.329622000 | -1.222780000 | -2.136410000 |
| 6  | -1.809101000 | -1.682501000 | 1.185418000  |
| 1  | -1.213812000 | -1.314699000 | 2.011496000  |
| 6  | -2.768111000 | -2.662138000 | 1.424738000  |
| 6  | -3.398831000 | -2.619760000 | -0.898609000 |
| 6  | -3.562366000 | -3.137359000 | 0.382802000  |
| 1  | -4.018772000 | -2.976522000 | -1.713331000 |
| 1  | -2.898692000 | -3.047855000 | 2.429385000  |
| 1  | -4.307991000 | -3.901206000 | 0.571971000  |
| 8  | -0.538917000 | 0.227117000  | -2.070682000 |
| 6  | -0.489872000 | 1.412960000  | -2.888535000 |
| 1  | 0.497994000  | 1.874354000  | -2.856247000 |
| 1  | -0.700691000 | 1.074118000  | -3.902737000 |
| 1  | -1.243187000 | 2.134904000  | -2.575624000 |

[CpMn(CO)<sub>2</sub>(η<sup>2</sup>-HP(NH<sub>2</sub>)Ph·BCl<sub>3</sub>)] **14**

|   |             |              |              |
|---|-------------|--------------|--------------|
| 6 | 3.365376000 | -1.815237000 | -0.068563000 |
| 6 | 2.503977000 | -2.012659000 | -1.188508000 |
| 6 | 1.248862000 | -2.461883000 | -0.709610000 |
| 6 | 1.322298000 | -2.543463000 | 0.706614000  |
| 6 | 2.629777000 | -2.152168000 | 1.101652000  |
| 1 | 4.393759000 | -1.490518000 | -0.103665000 |
| 1 | 2.761884000 | -1.852847000 | -2.224580000 |
| 1 | 0.385190000 | -2.688144000 | -1.313132000 |

|    |              |              |              |
|----|--------------|--------------|--------------|
| 1  | 0.521606000  | -2.846662000 | 1.362538000  |
| 1  | 2.999119000  | -2.113057000 | 2.115328000  |
| 25 | 1.695650000  | -0.486957000 | 0.116229000  |
| 6  | 2.293621000  | 0.743883000  | -1.082038000 |
| 8  | 2.763348000  | 1.431600000  | -1.864552000 |
| 6  | 2.297847000  | 0.605219000  | 1.423126000  |
| 8  | 2.695590000  | 1.238792000  | 2.284396000  |
| 15 | -0.434487000 | 0.215364000  | -0.553564000 |
| 1  | 0.619198000  | -0.203725000 | 1.162908000  |
| 5  | -1.073944000 | 2.004190000  | 0.121429000  |
| 17 | -1.054319000 | 2.028700000  | 1.982555000  |
| 17 | -2.786028000 | 2.243801000  | -0.566556000 |
| 17 | 0.112788000  | 3.267863000  | -0.572301000 |
| 6  | -1.699120000 | -1.064323000 | -0.163981000 |
| 6  | -2.264783000 | -1.846464000 | -1.178106000 |
| 1  | -1.941810000 | -1.710289000 | -2.202462000 |
| 6  | -2.127527000 | -1.251728000 | 1.157557000  |
| 1  | -1.723101000 | -0.641298000 | 1.954863000  |
| 6  | -3.099803000 | -2.202528000 | 1.452998000  |
| 6  | -3.238393000 | -2.797046000 | -0.876155000 |
| 6  | -3.657313000 | -2.978905000 | 0.438494000  |
| 1  | -3.670991000 | -3.391401000 | -1.673142000 |
| 1  | -3.429379000 | -2.328023000 | 2.478082000  |
| 1  | -4.417503000 | -3.715688000 | 0.671773000  |
| 7  | -0.512634000 | 0.229620000  | -2.277683000 |
| 1  | 0.231570000  | 0.785997000  | -2.683681000 |
| 1  | -1.397245000 | 0.625308000  | -2.592960000 |

[CpMn(CO)<sub>2</sub>(η<sup>2</sup>-HPFH·BCl<sub>3</sub>)] **15**

|    |              |              |              |
|----|--------------|--------------|--------------|
| 6  | 2.283575000  | -0.934637000 | -1.643697000 |
| 6  | 1.003633000  | -1.493261000 | -1.389444000 |
| 6  | 1.031694000  | -2.084709000 | -0.096754000 |
| 6  | 2.331170000  | -1.898360000 | 0.441869000  |
| 6  | 3.111117000  | -1.180148000 | -0.511462000 |
| 1  | 2.576927000  | -0.417834000 | -2.545208000 |
| 1  | 0.157483000  | -1.484176000 | -2.058562000 |
| 1  | 0.200424000  | -2.576189000 | 0.383951000  |
| 1  | 2.669767000  | -2.242743000 | 1.407425000  |
| 1  | 4.147202000  | -0.897807000 | -0.406226000 |
| 25 | 1.463353000  | 0.036733000  | 0.105985000  |
| 6  | 1.983168000  | 1.635809000  | -0.577568000 |
| 8  | 2.353551000  | 2.621287000  | -1.019088000 |
| 6  | 2.111968000  | 0.593299000  | 1.695701000  |
| 8  | 2.514397000  | 0.900858000  | 2.718957000  |
| 15 | -0.609795000 | 0.883508000  | -0.234975000 |
| 9  | -0.712795000 | 1.440592000  | -1.765037000 |
| 1  | 0.368871000  | -0.028492000 | 1.187458000  |
| 1  | -0.757623000 | 2.095880000  | 0.470008000  |
| 5  | -2.319458000 | -0.091513000 | 0.166108000  |



|    |              |              |              |
|----|--------------|--------------|--------------|
| 17 | -2.430177000 | -1.663793000 | -0.810804000 |
| 17 | -2.168767000 | -0.415727000 | 2.002238000  |
| 17 | -3.687470000 | 1.071728000  | -0.227896000 |

[CpMn(CO)<sub>2</sub>(η<sup>2</sup>-HPClH·BCl<sub>3</sub>)] **16**

|    |              |              |              |
|----|--------------|--------------|--------------|
| 6  | -2.290869000 | 0.542286000  | 1.788132000  |
| 6  | -1.056799000 | -0.113358000 | 2.030682000  |
| 6  | -1.171512000 | -1.454647000 | 1.575632000  |
| 6  | -2.485075000 | -1.631828000 | 1.066450000  |
| 6  | -3.182375000 | -0.395522000 | 1.188782000  |
| 1  | -2.514201000 | 1.571423000  | 2.025812000  |
| 1  | -0.178377000 | 0.324619000  | 2.478460000  |
| 1  | -0.389167000 | -2.196798000 | 1.609910000  |
| 1  | -2.884777000 | -2.546530000 | 0.654982000  |
| 1  | -4.207209000 | -0.211040000 | 0.905868000  |
| 25 | -1.511339000 | -0.123507000 | -0.113382000 |
| 6  | -2.033688000 | 1.446899000  | -0.870535000 |
| 8  | -2.406315000 | 2.421456000  | -1.332066000 |
| 6  | -2.119024000 | -0.945669000 | -1.598190000 |
| 8  | -2.497623000 | -1.513994000 | -2.513496000 |
| 15 | 0.610794000  | 0.668483000  | -0.475685000 |
| 17 | 0.874374000  | 2.581041000  | 0.364564000  |
| 1  | -0.439677000 | -1.003529000 | -0.774227000 |
| 1  | 0.770157000  | 1.006665000  | -1.835912000 |
| 5  | 2.283588000  | -0.421482000 | -0.084776000 |
| 17 | 2.387741000  | -0.784333000 | 1.727201000  |
| 17 | 1.980357000  | -1.965481000 | -1.095350000 |
| 17 | 3.717200000  | 0.537853000  | -0.701852000 |

[CpMn(CO)<sub>2</sub>(η<sup>2</sup>-HPBrH·BCl<sub>3</sub>)] **17**

|    |              |              |              |
|----|--------------|--------------|--------------|
| 6  | -2.300707000 | 0.770257000  | 1.700562000  |
| 6  | -1.154298000 | -0.000417000 | 2.021742000  |
| 6  | -1.439978000 | -1.361698000 | 1.730942000  |
| 6  | -2.772669000 | -1.433274000 | 1.245915000  |
| 6  | -3.309626000 | -0.114448000 | 1.217085000  |
| 1  | -2.391354000 | 1.840251000  | 1.811226000  |
| 1  | -0.220777000 | 0.375315000  | 2.410427000  |
| 1  | -0.755293000 | -2.186026000 | 1.855685000  |
| 1  | -3.288267000 | -2.333577000 | 0.946903000  |
| 1  | -4.307418000 | 0.160840000  | 0.912137000  |
| 25 | -1.635196000 | -0.208768000 | -0.105480000 |
| 6  | -1.994392000 | 1.298896000  | -1.059545000 |
| 8  | -2.267596000 | 2.239284000  | -1.645113000 |
| 6  | -2.336633000 | -1.145568000 | -1.476632000 |
| 8  | -2.779768000 | -1.783687000 | -2.313749000 |
| 15 | 0.563959000  | 0.291736000  | -0.559216000 |
| 35 | 1.119966000  | 2.399155000  | 0.097496000  |
| 1  | -0.666341000 | -1.272207000 | -0.644419000 |

|    |             |              |              |
|----|-------------|--------------|--------------|
| 1  | 0.737315000 | 0.450304000  | -1.950766000 |
| 5  | 2.098209000 | -0.955882000 | -0.056579000 |
| 17 | 2.180644000 | -1.136984000 | 1.783450000  |
| 17 | 1.587477000 | -2.547553000 | -0.895758000 |
| 17 | 3.634911000 | -0.263112000 | -0.773276000 |

[CpMn(CO)<sub>2</sub>(η<sup>2</sup>-HPPPhH·BCl<sub>3</sub>)] **18**

|    |              |              |              |
|----|--------------|--------------|--------------|
| 6  | 1.654427000  | -1.757306000 | 1.713157000  |
| 6  | 1.131294000  | -0.484454000 | 2.053921000  |
| 6  | 2.141247000  | 0.487804000  | 1.827187000  |
| 6  | 3.300661000  | -0.190543000 | 1.364662000  |
| 6  | 3.003750000  | -1.579729000 | 1.283064000  |
| 1  | 1.125017000  | -2.695730000 | 1.778745000  |
| 1  | 0.139291000  | -0.278349000 | 2.420419000  |
| 1  | 2.034461000  | 1.550104000  | 1.980808000  |
| 1  | 4.243510000  | 0.271050000  | 1.112136000  |
| 1  | 3.683914000  | -2.359306000 | 0.976667000  |
| 25 | 1.721327000  | -0.519757000 | -0.056531000 |
| 6  | 1.276991000  | -1.938444000 | -1.091553000 |
| 8  | 1.046295000  | -2.858336000 | -1.731706000 |
| 6  | 2.853077000  | -0.015476000 | -1.354381000 |
| 8  | 3.597207000  | 0.341793000  | -2.146610000 |
| 15 | -0.440990000 | 0.223184000  | -0.605610000 |
| 1  | 1.525786000  | 0.912944000  | -0.556813000 |
| 1  | -0.522650000 | 0.247769000  | -2.012722000 |
| 5  | -0.990067000 | 2.113117000  | -0.123538000 |
| 17 | -0.991817000 | 2.328305000  | 1.736151000  |
| 17 | 0.305526000  | 3.200870000  | -0.912285000 |
| 17 | -2.662496000 | 2.397713000  | -0.844401000 |
| 6  | -1.768410000 | -0.991425000 | -0.232974000 |
| 6  | -2.425418000 | -0.981413000 | 1.004115000  |
| 1  | -2.184661000 | -0.229296000 | 1.744925000  |
| 6  | -2.144925000 | -1.934882000 | -1.197790000 |
| 1  | -1.662181000 | -1.946996000 | -2.167974000 |
| 6  | -3.150875000 | -2.857652000 | -0.925639000 |
| 6  | -3.430883000 | -1.906862000 | 1.270935000  |
| 6  | -3.792818000 | -2.848614000 | 0.310580000  |
| 1  | -3.941455000 | -1.880310000 | 2.226779000  |
| 1  | -3.437047000 | -3.577520000 | -1.683860000 |
| 1  | -4.579327000 | -3.564559000 | 0.519913000  |

[CpMn(CO)<sub>2</sub>(η<sup>2</sup>-HPMeH·BCl<sub>3</sub>)] **19**

|   |             |              |              |
|---|-------------|--------------|--------------|
| 6 | 2.310666000 | -0.316710000 | -1.855592000 |
| 6 | 1.046310000 | -0.956882000 | -1.803225000 |
| 6 | 1.087986000 | -1.934909000 | -0.773902000 |
| 6 | 2.388095000 | -1.909848000 | -0.201658000 |
| 6 | 3.147987000 | -0.902374000 | -0.861475000 |
| 1 | 2.594313000 | 0.468820000  | -2.539893000 |

|    |              |              |              |
|----|--------------|--------------|--------------|
| 1  | 0.192379000  | -0.750634000 | -2.428579000 |
| 1  | 0.268321000  | -2.572263000 | -0.480570000 |
| 1  | 2.737011000  | -2.543347000 | 0.599898000  |
| 1  | 4.177984000  | -0.648466000 | -0.664695000 |
| 25 | 1.481472000  | 0.007460000  | 0.118745000  |
| 6  | 2.013312000  | 1.734798000  | 0.057900000  |
| 8  | 2.379407000  | 2.818353000  | 0.003553000  |
| 6  | 2.043509000  | -0.042276000 | 1.823875000  |
| 8  | 2.396407000  | -0.125707000 | 2.908586000  |
| 15 | -0.644478000 | 0.984839000  | 0.054486000  |
| 1  | 0.404933000  | -0.457353000 | 1.098574000  |
| 1  | -0.768299000 | 1.822599000  | 1.183093000  |
| 5  | -2.285222000 | -0.179181000 | 0.160451000  |
| 17 | -2.455871000 | -1.105995000 | -1.455299000 |
| 17 | -2.044810000 | -1.344057000 | 1.593928000  |
| 17 | -3.722712000 | 0.958252000  | 0.437698000  |
| 6  | -0.888795000 | 2.189081000  | -1.326076000 |
| 1  | -0.115631000 | 2.957496000  | -1.322614000 |
| 1  | -0.869979000 | 1.658265000  | -2.278181000 |
| 1  | -1.867812000 | 2.655862000  | -1.208931000 |

[CpMn(CO)<sub>2</sub>(η<sup>2</sup>-HP(OMe)H·BCl<sub>3</sub>)] **20**

|    |              |              |              |
|----|--------------|--------------|--------------|
| 6  | -2.318862000 | 0.426122000  | 1.848851000  |
| 6  | -1.083652000 | -0.252462000 | 2.009913000  |
| 6  | -1.210160000 | -1.541776000 | 1.426327000  |
| 6  | -2.529750000 | -1.663198000 | 0.915863000  |
| 6  | -3.220524000 | -0.442368000 | 1.169686000  |
| 1  | -2.533753000 | 1.429099000  | 2.185373000  |
| 1  | -0.197716000 | 0.140691000  | 2.482283000  |
| 1  | -0.430378000 | -2.285382000 | 1.372213000  |
| 1  | -2.937199000 | -2.530815000 | 0.419154000  |
| 1  | -4.246643000 | -0.225268000 | 0.916337000  |
| 25 | -1.558701000 | -0.055959000 | -0.120044000 |
| 6  | -1.951145000 | 1.634559000  | -0.652868000 |
| 8  | -2.242532000 | 2.691515000  | -0.973477000 |
| 6  | -2.259462000 | -0.632832000 | -1.672295000 |
| 8  | -2.700631000 | -1.049053000 | -2.641651000 |
| 15 | 0.589167000  | 0.679478000  | -0.429227000 |
| 8  | 0.707149000  | 2.074692000  | 0.434265000  |
| 1  | -0.575622000 | -0.923458000 | -0.911170000 |
| 1  | 0.762059000  | 1.098611000  | -1.773358000 |
| 5  | 2.170960000  | -0.532645000 | -0.128549000 |
| 17 | 2.412226000  | -0.765949000 | 1.703146000  |
| 17 | 1.761825000  | -2.134939000 | -0.991385000 |
| 17 | 3.648378000  | 0.276426000  | -0.910884000 |
| 6  | 1.882312000  | 2.912711000  | 0.436221000  |
| 1  | 2.189034000  | 3.154608000  | -0.584692000 |
| 1  | 1.594717000  | 3.823013000  | 0.960620000  |
| 1  | 2.705000000  | 2.423026000  | 0.957296000  |

[CpMn(CO)<sub>2</sub>(η<sup>2</sup>-HP(NH<sub>2</sub>)H·BCl<sub>3</sub>)] **21**

|    |              |              |              |
|----|--------------|--------------|--------------|
| 6  | 2.290144000  | -0.544436000 | -1.801889000 |
| 6  | 1.039572000  | -1.194117000 | -1.642058000 |
| 6  | 1.122040000  | -2.031117000 | -0.497449000 |
| 6  | 2.429983000  | -1.905575000 | 0.043817000  |
| 6  | 3.157316000  | -0.979804000 | -0.756521000 |
| 1  | 2.542346000  | 0.152386000  | -2.586911000 |
| 1  | 0.168960000  | -1.060265000 | -2.264018000 |
| 1  | 0.321569000  | -2.641632000 | -0.110060000 |
| 1  | 2.804518000  | -2.420272000 | 0.915871000  |
| 1  | 4.184481000  | -0.682238000 | -0.612988000 |
| 25 | 1.483987000  | 0.022565000  | 0.117782000  |
| 6  | 1.976126000  | 1.730544000  | -0.192789000 |
| 8  | 2.306423000  | 2.804922000  | -0.418254000 |
| 6  | 2.056277000  | 0.219439000  | 1.812203000  |
| 8  | 2.416534000  | 0.293846000  | 2.894447000  |
| 15 | -0.627344000 | 0.944065000  | -0.098805000 |
| 1  | 0.393584000  | -0.319959000 | 1.135655000  |
| 1  | -0.767528000 | 1.933781000  | 0.907478000  |
| 5  | -2.288546000 | -0.149644000 | 0.170847000  |
| 17 | -2.394016000 | -1.523652000 | -1.076192000 |
| 17 | -2.170530000 | -0.799948000 | 1.910336000  |
| 17 | -3.706625000 | 1.043616000  | -0.027503000 |
| 7  | -0.796534000 | 1.696554000  | -1.617795000 |
| 1  | -0.166399000 | 2.457603000  | -1.834091000 |
| 1  | -1.755071000 | 1.927827000  | -1.857425000 |

**Cartesian Coordinates for complexes 1a-21a as determined by DFT calculations at the [B3LYP/6-311G(d,p)] level of approximation.**

**HPFCl·BCl<sub>3</sub> 1a**

|    |              |              |              |
|----|--------------|--------------|--------------|
| 15 | 0.950652000  | 0.537673000  | -0.432524000 |
| 9  | 1.329490000  | 1.957042000  | 0.164775000  |
| 1  | 1.131386000  | 0.751209000  | -1.811508000 |
| 17 | 2.536008000  | -0.623605000 | 0.049599000  |
| 5  | -0.894359000 | -0.152160000 | 0.063967000  |
| 17 | -1.953843000 | 1.228139000  | -0.527921000 |
| 17 | -0.984063000 | -1.657224000 | -0.991787000 |
| 17 | -0.944266000 | -0.457244000 | 1.852259000  |

**HPCl<sub>2</sub>·BCl<sub>3</sub> 2a**

|    |              |              |              |
|----|--------------|--------------|--------------|
| 15 | 0.904454000  | 0.000107000  | -0.485172000 |
| 17 | 2.002287000  | 1.631813000  | 0.062991000  |
| 1  | 1.068579000  | -0.000028000 | -1.883671000 |
| 17 | 2.002316000  | -1.631413000 | 0.063366000  |
| 5  | -1.103136000 | 0.000005000  | 0.071121000  |
| 17 | -1.679533000 | 1.536315000  | -0.743750000 |
| 17 | -1.678682000 | -1.536085000 | -0.745156000 |
| 17 | -1.182843000 | -0.000724000 | 1.880528000  |

**HPBrCl·BCl<sub>3</sub> 3a**

|    |              |              |              |
|----|--------------|--------------|--------------|
| 15 | -0.432065000 | 0.485861000  | -0.499494000 |
| 35 | -2.240169000 | -0.677483000 | 0.028178000  |
| 1  | -0.548968000 | 0.579686000  | -1.900775000 |
| 17 | -0.788093000 | 2.419703000  | 0.067011000  |
| 5  | 1.421037000  | -0.307377000 | 0.072526000  |
| 17 | 1.373875000  | -1.929989000 | -0.773904000 |
| 17 | 2.556533000  | 0.903337000  | -0.701425000 |
| 17 | 1.465370000  | -0.370628000 | 1.881515000  |

**HPPhCl·BCl<sub>3</sub> 4a**

|    |              |              |              |
|----|--------------|--------------|--------------|
| 15 | 0.148024000  | 0.750329000  | -0.439171000 |
| 1  | 0.170636000  | 1.115202000  | -1.796625000 |
| 17 | 0.352614000  | 2.581556000  | 0.490757000  |
| 5  | 1.673858000  | -0.538458000 | -0.049945000 |
| 17 | 1.181224000  | -1.978215000 | -1.104452000 |
| 17 | 1.693654000  | -0.908932000 | 1.749311000  |
| 17 | 3.187650000  | 0.309966000  | -0.644262000 |
| 6  | -1.552747000 | 0.207407000  | -0.181915000 |
| 6  | -2.522207000 | 0.498060000  | -1.151501000 |
| 6  | -1.898006000 | -0.512132000 | 0.970151000  |
| 1  | -2.258495000 | 1.052836000  | -2.044729000 |

|   |              |              |              |
|---|--------------|--------------|--------------|
| 1 | -1.148486000 | -0.747909000 | 1.715059000  |
| 6 | -3.832026000 | 0.070151000  | -0.966238000 |
| 6 | -3.211477000 | -0.932879000 | 1.144718000  |
| 1 | -4.581340000 | 0.291447000  | -1.716798000 |
| 1 | -3.480046000 | -1.492653000 | 2.032497000  |
| 6 | -4.175593000 | -0.643650000 | 0.180364000  |
| 1 | -5.196998000 | -0.977689000 | 0.321394000  |

HPMeCl·BCl<sub>3</sub> **5a**

|    |              |              |              |
|----|--------------|--------------|--------------|
| 15 | 0.979063000  | 0.430875000  | -0.503664000 |
| 1  | 1.098088000  | 0.493622000  | -1.904047000 |
| 17 | 2.497179000  | -0.852192000 | 0.007336000  |
| 5  | -0.877441000 | -0.140643000 | 0.053054000  |
| 17 | -1.867317000 | 1.194056000  | -0.787861000 |
| 17 | -1.173228000 | -1.806146000 | -0.638849000 |
| 17 | -0.942292000 | -0.051988000 | 1.884635000  |
| 6  | 1.509423000  | 2.062031000  | 0.101598000  |
| 1  | 2.498693000  | 2.308478000  | -0.283485000 |
| 1  | 1.524786000  | 2.041659000  | 1.191759000  |
| 1  | 0.779333000  | 2.800743000  | -0.233565000 |

HP(OMe)Cl·BCl<sub>3</sub> **6a**

|    |              |              |              |
|----|--------------|--------------|--------------|
| 15 | 0.855490000  | -0.126853000 | -0.704479000 |
| 1  | 0.876570000  | -0.441952000 | -2.071689000 |
| 17 | 1.964795000  | -1.647731000 | 0.115760000  |
| 5  | -1.004689000 | -0.006217000 | 0.077236000  |
| 17 | -1.694665000 | 1.474845000  | -0.787507000 |
| 17 | -1.794277000 | -1.582433000 | -0.436007000 |
| 17 | -0.848879000 | 0.202926000  | 1.893906000  |
| 8  | 1.766534000  | 1.182141000  | -0.715590000 |
| 6  | 1.929850000  | 2.072030000  | 0.426529000  |
| 1  | 2.604992000  | 2.850665000  | 0.082085000  |
| 1  | 0.967226000  | 2.495944000  | 0.708518000  |
| 1  | 2.372382000  | 1.530599000  | 1.263042000  |

HP(NH<sub>2</sub>)Cl·BCl<sub>3</sub> **7a**

|    |              |              |              |
|----|--------------|--------------|--------------|
| 15 | -0.975548000 | -0.516800000 | -0.517316000 |
| 1  | -1.197772000 | -0.612149000 | -1.900026000 |
| 17 | -2.546913000 | 0.726741000  | 0.020391000  |
| 5  | 0.864012000  | 0.162748000  | 0.038979000  |
| 17 | 1.984955000  | -0.837343000 | -1.030703000 |
| 17 | 0.917989000  | 1.952251000  | -0.310769000 |
| 17 | 0.990117000  | -0.263099000 | 1.833112000  |
| 7  | -1.217983000 | -2.053388000 | 0.018088000  |
| 1  | -1.992904000 | -2.618178000 | -0.298577000 |
| 1  | -0.854803000 | -2.293044000 | 0.932295000  |

HPFPh·BCl<sub>3</sub> **8a**

|    |              |              |              |
|----|--------------|--------------|--------------|
| 15 | -0.153936000 | 0.992068000  | -0.124485000 |
| 1  | -0.181438000 | 2.019491000  | 0.833540000  |
| 5  | -1.699495000 | -0.249571000 | 0.142435000  |
| 17 | -1.314027000 | -0.920837000 | 1.830474000  |
| 17 | -1.702501000 | -1.530701000 | -1.178984000 |
| 17 | -3.192688000 | 0.825207000  | 0.119422000  |
| 6  | 1.528295000  | 0.373034000  | -0.045828000 |
| 6  | 1.858794000  | -0.867600000 | -0.610907000 |
| 1  | 1.096815000  | -1.474809000 | -1.082783000 |
| 6  | 2.516087000  | 1.148813000  | 0.579655000  |
| 1  | 2.264773000  | 2.105410000  | 1.023782000  |
| 6  | 3.825518000  | 0.685990000  | 0.635406000  |
| 6  | 3.172242000  | -1.318656000 | -0.550986000 |
| 6  | 4.152101000  | -0.545354000 | 0.069595000  |
| 1  | 3.429144000  | -2.277778000 | -0.984083000 |
| 1  | 4.587779000  | 1.283074000  | 1.121319000  |
| 1  | 5.173513000  | -0.905093000 | 0.116146000  |
| 9  | -0.258402000 | 1.822979000  | -1.493325000 |

HPClPh·BCl<sub>3</sub> **9a**

|    |              |              |              |
|----|--------------|--------------|--------------|
| 15 | 0.148024000  | 0.750329000  | -0.439171000 |
| 1  | 0.170636000  | 1.115202000  | -1.796625000 |
| 17 | 0.352614000  | 2.581556000  | 0.490757000  |
| 5  | 1.673858000  | -0.538458000 | -0.049945000 |
| 17 | 1.181224000  | -1.978215000 | -1.104452000 |
| 17 | 1.693654000  | -0.908932000 | 1.749311000  |
| 17 | 3.187650000  | 0.309966000  | -0.644262000 |
| 6  | -1.552747000 | 0.207407000  | -0.181915000 |
| 6  | -2.522207000 | 0.498060000  | -1.151501000 |
| 6  | -1.898006000 | -0.512132000 | 0.970151000  |
| 1  | -2.258495000 | 1.052836000  | -2.044729000 |
| 1  | -1.148486000 | -0.747909000 | 1.715059000  |
| 6  | -3.832026000 | 0.070151000  | -0.966238000 |
| 6  | -3.211477000 | -0.932879000 | 1.144718000  |
| 1  | -4.581340000 | 0.291447000  | -1.716798000 |
| 1  | -3.480046000 | -1.492653000 | 2.032497000  |
| 6  | -4.175593000 | -0.643650000 | 0.180364000  |
| 1  | -5.196998000 | -0.977689000 | 0.321394000  |

HPBrPh·BCl<sub>3</sub> **10a**

|    |             |              |              |
|----|-------------|--------------|--------------|
| 15 | 0.123958000 | 0.331257000  | -0.561741000 |
| 1  | 0.153925000 | 0.491120000  | -1.958995000 |
| 5  | 1.563772000 | -1.006655000 | -0.003950000 |
| 17 | 0.958892000 | -2.526980000 | -0.869683000 |
| 17 | 1.566836000 | -1.148757000 | 1.826552000  |
| 17 | 3.131702000 | -0.355527000 | -0.696537000 |

|    |              |              |              |
|----|--------------|--------------|--------------|
| 6  | -1.606185000 | -0.069548000 | -0.231880000 |
| 6  | -1.993630000 | -0.530555000 | 1.033771000  |
| 1  | -1.261575000 | -0.648478000 | 1.822776000  |
| 6  | -2.554783000 | 0.069056000  | -1.254047000 |
| 1  | -2.259290000 | 0.423882000  | -2.234781000 |
| 6  | -3.884936000 | -0.254077000 | -1.008826000 |
| 6  | -3.326788000 | -0.847462000 | 1.267452000  |
| 6  | -4.270220000 | -0.710204000 | 0.250231000  |
| 1  | -3.627464000 | -1.207392000 | 2.244058000  |
| 1  | -4.617745000 | -0.151169000 | -1.800196000 |
| 1  | -5.307540000 | -0.961661000 | 0.438590000  |
| 35 | 0.482412000  | 2.420182000  | 0.147673000  |

**HPhPh<sub>2</sub>·BCl<sub>3</sub> 11a**

|    |              |              |              |
|----|--------------|--------------|--------------|
| 15 | 0.003498000  | 0.105875000  | -0.676148000 |
| 1  | -0.089165000 | 0.174702000  | -2.079316000 |
| 5  | -0.130014000 | 1.990586000  | 0.041066000  |
| 17 | -1.753627000 | 2.609289000  | -0.594425000 |
| 17 | 1.302401000  | 2.922365000  | -0.673267000 |
| 17 | -0.081096000 | 1.895219000  | 1.890825000  |
| 6  | 1.546110000  | -0.812729000 | -0.351623000 |
| 6  | 1.735648000  | -2.058210000 | -0.967358000 |
| 6  | 2.532951000  | -0.295624000 | 0.493817000  |
| 1  | 0.971752000  | -2.469586000 | -1.617971000 |
| 1  | 2.399017000  | 0.665683000  | 0.971251000  |
| 6  | 2.903980000  | -2.775687000 | -0.740029000 |
| 6  | 3.699059000  | -1.024755000 | 0.719809000  |
| 1  | 3.047912000  | -3.736118000 | -1.221075000 |
| 1  | 4.461130000  | -0.620923000 | 1.375761000  |
| 6  | 3.886150000  | -2.259177000 | 0.105126000  |
| 1  | 4.796477000  | -2.820484000 | 0.282147000  |
| 6  | -1.390033000 | -0.974344000 | -0.230650000 |
| 6  | -1.416892000 | -1.600767000 | 1.021188000  |
| 6  | -2.461728000 | -1.136072000 | -1.115891000 |
| 1  | -0.593792000 | -1.473840000 | 1.714182000  |
| 1  | -2.454584000 | -0.643344000 | -2.081230000 |
| 6  | -2.508083000 | -2.386177000 | 1.377596000  |
| 6  | -3.548963000 | -1.925412000 | -0.751865000 |
| 1  | -2.527490000 | -2.867812000 | 2.348127000  |
| 1  | -4.376792000 | -2.048954000 | -1.440157000 |
| 6  | -3.572594000 | -2.550086000 | 0.492762000  |
| 1  | -4.421024000 | -3.162962000 | 0.774612000  |

**HPhMePh·BCl<sub>3</sub> 12a**

|    |             |              |              |
|----|-------------|--------------|--------------|
| 15 | 0.185557000 | 0.839447000  | -0.633230000 |
| 1  | 0.222883000 | 0.859851000  | -2.039479000 |
| 5  | 1.644679000 | -0.357206000 | 0.054133000  |
| 17 | 1.286055000 | -2.051359000 | -0.575619000 |



|    |              |              |              |
|----|--------------|--------------|--------------|
| 17 | 1.595707000  | -0.243157000 | 1.907720000  |
| 17 | 3.206905000  | 0.356986000  | -0.652481000 |
| 6  | -1.524281000 | 0.344859000  | -0.272978000 |
| 6  | -1.982023000 | 0.298152000  | 1.050632000  |
| 1  | -1.319403000 | 0.548205000  | 1.870316000  |
| 6  | -2.382211000 | -0.015123000 | -1.319102000 |
| 1  | -2.034291000 | 0.005701000  | -2.345588000 |
| 6  | -3.688315000 | -0.409807000 | -1.043538000 |
| 6  | -3.289196000 | -0.095982000 | 1.316465000  |
| 6  | -4.142488000 | -0.448531000 | 0.272312000  |
| 1  | -3.638295000 | -0.134603000 | 2.341565000  |
| 1  | -4.347583000 | -0.689175000 | -1.856905000 |
| 1  | -5.159155000 | -0.758079000 | 0.485188000  |
| 6  | 0.406049000  | 2.581844000  | -0.125431000 |
| 1  | 0.356684000  | 2.641183000  | 0.962444000  |
| 1  | 1.391217000  | 2.919106000  | -0.449399000 |
| 1  | -0.371341000 | 3.207675000  | -0.564043000 |

HP(OMe)Ph·BCl<sub>3</sub> **13a**

|    |              |              |              |
|----|--------------|--------------|--------------|
| 15 | 0.145989000  | 0.648510000  | -0.624354000 |
| 1  | 0.198187000  | 0.625050000  | -2.036735000 |
| 5  | 1.498988000  | -0.648889000 | 0.067176000  |
| 17 | 0.872081000  | -2.294164000 | -0.495566000 |
| 17 | 1.567737000  | -0.480185000 | 1.910571000  |
| 17 | 3.105490000  | -0.199465000 | -0.753376000 |
| 6  | -1.583708000 | 0.300270000  | -0.264054000 |
| 6  | -2.035012000 | 0.282406000  | 1.062152000  |
| 1  | -1.349876000 | 0.485664000  | 1.875759000  |
| 6  | -2.469075000 | 0.022893000  | -1.312024000 |
| 1  | -2.124494000 | 0.032928000  | -2.339769000 |
| 6  | -3.800336000 | -0.271053000 | -1.033619000 |
| 6  | -3.368134000 | -0.006896000 | 1.329602000  |
| 6  | -4.248973000 | -0.284259000 | 0.284980000  |
| 1  | -3.717889000 | -0.021795000 | 2.355013000  |
| 1  | -4.484668000 | -0.487562000 | -1.845298000 |
| 1  | -5.286392000 | -0.513388000 | 0.499955000  |
| 8  | 0.319735000  | 2.188388000  | -0.164730000 |
| 6  | 1.598489000  | 2.850222000  | 0.005616000  |
| 1  | 2.189663000  | 2.346861000  | 0.769794000  |
| 1  | 2.148596000  | 2.873057000  | -0.936289000 |
| 1  | 1.354487000  | 3.862236000  | 0.321215000  |

HP(NH<sub>2</sub>)Ph·BCl<sub>3</sub> **14a**

|    |              |              |              |
|----|--------------|--------------|--------------|
| 15 | -0.192566000 | -0.501841000 | -0.935856000 |
| 1  | -0.252048000 | 0.121910000  | -2.204376000 |
| 5  | -1.634489000 | 0.273659000  | 0.217021000  |
| 17 | -1.423495000 | 2.104345000  | 0.068518000  |
| 17 | -1.398203000 | -0.351467000 | 1.934149000  |

|    |              |              |              |
|----|--------------|--------------|--------------|
| 17 | -3.225681000 | -0.326814000 | -0.547601000 |
| 6  | 1.520655000  | -0.220182000 | -0.436068000 |
| 6  | 2.091269000  | -1.001405000 | 0.576918000  |
| 1  | 1.519902000  | -1.802152000 | 1.029730000  |
| 6  | 2.252515000  | 0.822682000  | -1.016123000 |
| 1  | 1.812844000  | 1.434154000  | -1.796080000 |
| 6  | 3.551080000  | 1.078621000  | -0.586734000 |
| 6  | 3.392107000  | -0.741504000 | 0.995127000  |
| 6  | 4.120450000  | 0.296604000  | 0.416040000  |
| 1  | 3.834597000  | -1.345791000 | 1.778233000  |
| 1  | 4.116855000  | 1.886137000  | -1.036020000 |
| 1  | 5.132766000  | 0.496945000  | 0.747755000  |
| 7  | -0.390324000 | -2.155757000 | -1.049885000 |
| 1  | 0.206101000  | -2.696323000 | -1.659810000 |
| 1  | -1.340818000 | -2.497252000 | -0.988584000 |

**HPFH·BCl<sub>3</sub> 15a**

|    |              |              |              |
|----|--------------|--------------|--------------|
| 15 | 1.414793000  | 0.587414000  | -0.000176000 |
| 9  | 2.640357000  | -0.434024000 | 0.000031000  |
| 1  | 1.692179000  | 1.406870000  | -1.107840000 |
| 1  | 1.691812000  | 1.406944000  | 1.107536000  |
| 5  | -0.455007000 | -0.095564000 | 0.000009000  |
| 17 | -1.207664000 | 1.622906000  | -0.002006000 |
| 17 | -0.751692000 | -1.026235000 | -1.540398000 |
| 17 | -0.752060000 | -1.022611000 | 1.542558000  |

**HPClH·BCl<sub>3</sub> 16a**

|    |              |              |              |
|----|--------------|--------------|--------------|
| 15 | 0.995289000  | 0.885118000  | -0.000380000 |
| 17 | 2.777509000  | -0.125983000 | 0.000070000  |
| 1  | 1.121793000  | 1.754975000  | -1.098572000 |
| 1  | 1.121627000  | 1.755744000  | 1.097226000  |
| 5  | -0.770694000 | -0.129497000 | 0.000005000  |
| 17 | -1.858351000 | 1.379697000  | -0.000575000 |
| 17 | -0.851307000 | -1.102277000 | -1.539083000 |
| 17 | -0.851338000 | -1.100849000 | 1.540001000  |

**HPBrH·BCl<sub>3</sub> 17a**

|    |              |              |              |
|----|--------------|--------------|--------------|
| 15 | 0.450863000  | 0.948447000  | -0.001246000 |
| 35 | 2.430013000  | -0.053419000 | -0.000092000 |
| 1  | 0.531115000  | 1.827630000  | -1.097671000 |
| 1  | 0.531014000  | 1.829763000  | 1.093454000  |
| 5  | -1.284714000 | -0.137005000 | -0.000022000 |
| 17 | -2.436656000 | 1.321887000  | -0.000301000 |
| 17 | -1.325285000 | -1.113041000 | -1.538271000 |
| 17 | -1.323468000 | -1.110575000 | 1.540116000  |

**HPhH·BCl<sub>3</sub> 18a**

|    |              |              |              |
|----|--------------|--------------|--------------|
| 15 | 0.194746000  | -0.305987000 | -1.146426000 |
| 6  | -1.519548000 | -0.134137000 | -0.582967000 |
| 6  | -2.069640000 | 1.140776000  | -0.398863000 |
| 1  | -1.488620000 | 2.028251000  | -0.620676000 |
| 6  | -2.270829000 | -1.273713000 | -0.272598000 |
| 1  | -1.848899000 | -2.263663000 | -0.402587000 |
| 6  | -3.568301000 | -1.135654000 | 0.211356000  |
| 6  | -3.368138000 | 1.267801000  | 0.083101000  |
| 6  | -4.117042000 | 0.132389000  | 0.387269000  |
| 1  | -3.792771000 | 2.254613000  | 0.223921000  |
| 1  | -4.148119000 | -2.019139000 | 0.450660000  |
| 1  | -5.127854000 | 0.236477000  | 0.764099000  |
| 1  | 0.318311000  | 0.517436000  | -2.281522000 |
| 1  | 0.264749000  | -1.600764000 | -1.691079000 |
| 5  | 1.700457000  | 0.025508000  | 0.156830000  |
| 17 | 3.223637000  | -0.299065000 | -0.841425000 |
| 17 | 1.543511000  | 1.788813000  | 0.684994000  |
| 17 | 1.461129000  | -1.176554000 | 1.533232000  |

**HPMeH·BCl<sub>3</sub> 19a**

|    |              |              |              |
|----|--------------|--------------|--------------|
| 15 | 1.257885000  | 0.956852000  | -0.000766000 |
| 1  | 1.365829000  | 1.830092000  | -1.098928000 |
| 1  | 1.365857000  | 1.831494000  | 1.096277000  |
| 5  | -0.467798000 | -0.070780000 | 0.000046000  |
| 17 | -1.800690000 | 1.203104000  | -0.001086000 |
| 17 | -0.429491000 | -1.092274000 | -1.542420000 |
| 17 | -0.429527000 | -1.089552000 | 1.544320000  |
| 6  | 2.785395000  | -0.043414000 | -0.000055000 |
| 1  | 3.669489000  | 0.594421000  | -0.000641000 |
| 1  | 2.786126000  | -0.677267000 | 0.887309000  |
| 1  | 2.786075000  | -0.678873000 | -0.886258000 |

**HP(OMe)H·BCl<sub>3</sub> 20a**

|    |              |              |              |
|----|--------------|--------------|--------------|
| 15 | 0.015043883  | 0.676151925  | -0.402566880 |
| 1  | 0.021354883  | 0.980599925  | -1.782332880 |
| 5  | 1.718473000  | -0.484767000 | 0.006047000  |
| 17 | 1.351492000  | -1.953096000 | -1.072573000 |
| 17 | 1.663268000  | -0.879461000 | 1.806795000  |
| 17 | 3.251743000  | 0.404136000  | -0.500387000 |
| 1  | -1.298693883 | 0.192636075  | -0.210613120 |
| 8  | 0.183172883  | 2.078889925  | 0.379370120  |
| 6  | -0.688480117 | 3.202066925  | 0.149487120  |
| 1  | -0.339671117 | 3.992286925  | 0.810454120  |
| 1  | -0.616671117 | 3.535030925  | -0.890084880 |
| 1  | -1.722902117 | 2.945240925  | 0.388965120  |

HP(NH<sub>2</sub>)H·BCl<sub>3</sub> **21a**

|    |              |              |              |
|----|--------------|--------------|--------------|
| 15 | -1.270383000 | 0.911629000  | -0.011454000 |
| 1  | -1.395592000 | 1.787721000  | 1.081907000  |
| 1  | -1.400058000 | 1.759458000  | -1.126251000 |
| 5  | 0.453358000  | -0.073936000 | 0.000540000  |
| 17 | 1.748158000  | 1.240563000  | -0.010263000 |
| 17 | 0.429482000  | -1.081815000 | 1.555533000  |
| 17 | 0.436180000  | -1.114384000 | -1.532464000 |
| 7  | -2.731679000 | 0.059749000  | -0.000368000 |
| 1  | -2.856522000 | -0.514743000 | 0.827075000  |
| 1  | -2.872065000 | -0.509621000 | -0.828735000 |

References

- <sup>1</sup> Frisch, M. J.; Trucks, G. W.; Schlegel, H. B.; Scuseria, G. E.; Robb, M. A.; Cheeseman, J. R.; Montgomery, J. A., Jr.; Vreven, T.; Kudin, K. N.; Burant, J. C.; Millam, J. M.; Iyengar, S. S.; Tomasi, J.; Barone, V.; Mennucci, B.; Cossi, M.; Scalmani, G.; Rega, N.; Petersson, G. A.; Nakatsuji, H.; Hada, M.; Ehara, M.; Toyota, K.; Fukuda, R.; Hasegawa, J.; Ishida, M.; Nakajima, T.; Honda, Y.; Kitao, O.; Nakai, H.; Klene, M.; Li, X.; Knox, J. E.; Hratchian, H. P.; Cross, J. B.; Adamo, C.; Jaramillo, J.; Gomperts, R.; Stratmann, R. E.; Yazyev, O.; Austin, A. J.; Cammi, R.; Pomelli, C.; Ochterski, J. W.; Ayala, P. Y.; Morokuma, K.; Voth, G. A.; Salvador, P.; Dannenberg, J. J.; Zakrzewski, V. G.; Dapprich, S.; Daniels, A. D.; Strain, M. C.; Farkas, O.; Malick, D. K.; Rabuck, A. D.; Raghavachari, K.; Foresman, J. B.; Ortiz, J. V.; Cui, Q.; Baboul, A. G.; Clifford, S.; Cioslowski, J.; Stefanov, B. B.; Liu, G.; Liashenko, A.; Piskorz, P.; Komaromi, I.; Martin, R. L.; Fox, D. J.; Keith, T.; Al-Laham, M. A.; Peng, C. Y.; Nanayakkara, A.; Challacombe, M.; Gill, P. M. W.; Johnson, B.; Chen, W.; Wong, M. W.; Gonzalez, C.; Pople, J. A., *Gaussian 03*, Revision B.05, Gaussian Inc., Pittsburgh PA, **2003**.
- <sup>2</sup> (a) Becke, A. D. *J. Chem. Phys.* **1993**, *98*, 5648; (b) Lee, C.; Yang, W.; Parr, R. G. *Phys. Rev. B* **1988**, *37*, 785; (c) Miehlich, B.; Savin, A.; Stoll, H.; Preuss, H. *Chem. Phys. Lett.* **1989**, *157*, 200.
- <sup>3</sup> (a) McLean, A. D.; Chandler, G. S. *J. Chem. Phys.* **1980**, *72*, 5639. (b) Krishnan, R.; Binkley, J. S.; Seeger, R.; Pople, J. A. *J. Chem. Phys.* **1980**, *72*, 650. (c) Wachters, A. J. H. *J. Chem. Phys.* **1970**, *52*, 1033. (d) Hay, P. J. *J. Chem. Phys.* **1977**, *66*, 4377. (e) Raghavachari, K.; Trucks, G. W. *J. Chem. Phys.* **1989**, *91*, 1062.
